# Supplementary material for: MicroRNA-34a Modulates c-Myc Transcriptional Complexes to Suppress Malignancy in Human Prostate Cancer Cells
Source: PLoS One. 2012 Jan 3;7(1):e29722. doi: 10.1371/journal.pone.0029722 (PMC3250472; doi:10.1371/journal.pone.0029722)
Supplement: Table S1 — Clinical data of laser capture microdissected (LCM) prostate cancer tissues. (XLSX) [file pone.0029722.s005.xlsx]

## Sheet: Sheet1
Table S1. Clinical data of laser capture microdissected (LCM) prostate cancer tissues
Sample Number	Pathology	Age at diagnosis	Gleason Pattern	pT satge	pN stage	pM stage	PSA (ng/ml)
1	Adenocarcinoma	66	3 + 4	2c	0	X	24.9
2	Adenocarcinoma	67	3 + 3	2c	0	X	21.3
3	Adenocarcinoma	61	4 + 3	2c	X	X	5.9
4	Adenocarcinoma	64	3 + 4	2a	0	X	9.3
5	Adenocarcinoma	57	3 + 3	2c	X	X	4.3
6	Adenocarcinoma	67	3 + 4	2c	X	X	5.1
7	Adenocarcinoma	68	3 + 3	2c	X	X	4.1
8	Adenocarcinoma	68	3 + 3	2c	X	X	5.6
9	Adenocarcinoma	52	3 + 3	2c	X	X	5.1
10	Adenocarcinoma	57	3 + 3	3b	0	X	38.3
PSA: prostate-specific antigen
